# Supplementary material for: Telomere dynamics from hatching to sexual maturity and maternal effects in the “multivariate egg”
Source: Oxford University Press journal article supplement (doi:10.1242/jeb.232496), 2020-01-01
Supplement: jeb232496supp.pdf [file jeb232496supp.pdf]

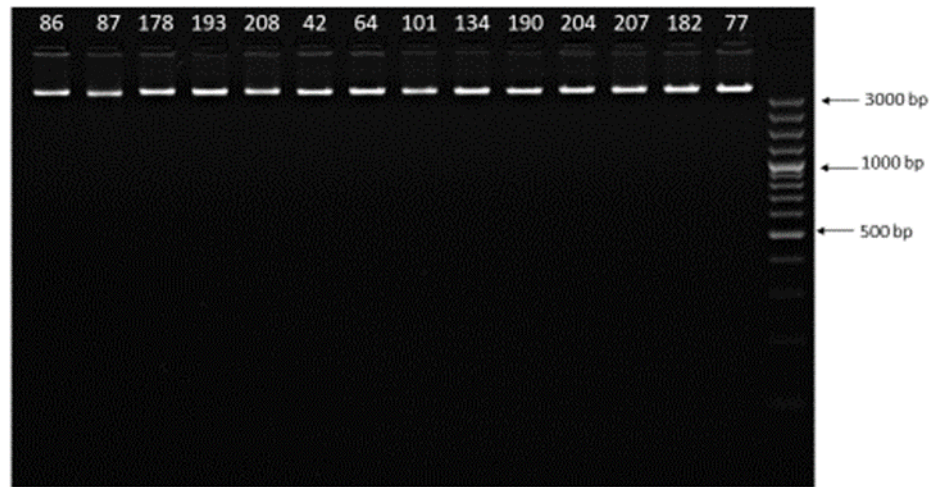

**Figure S1:** Digital photography of genomic DNA extracted from red blood cells of zebra finches (14 randomly chosen individuals) and exposed to UV light. The electrophoresis was conducted on an agarose gel (0.7%), at 2.5 mV/cm in 45mM Tris-borate, 1mM EDTA medium. The DNA size marker is indicated on the left. The absence of DNA smir indicated that the genomic DNA was not degraded after extraction.

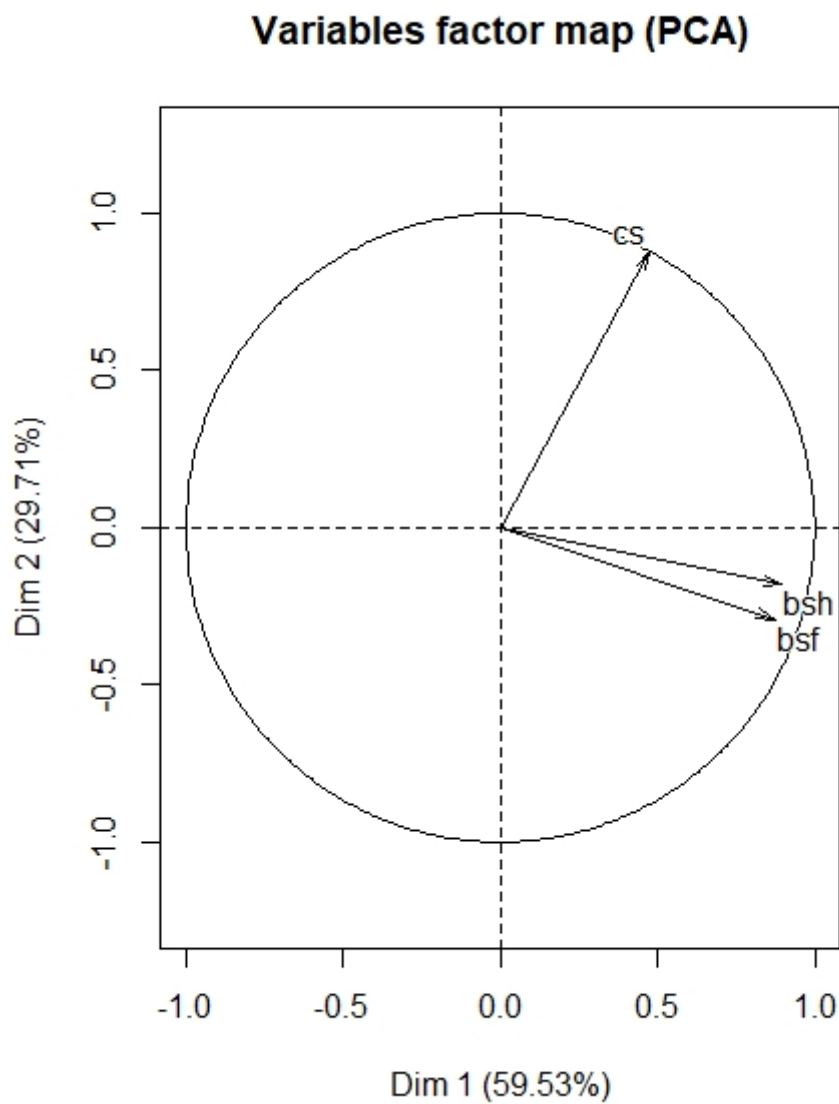

**Figure S2:** Principal component analysis conducted on clutch size, brood size at hatching and at fledging of 32 females zebra finches. Two axes were produced, explaining 89% of the total variance. PC1 axis (eigenvalue, 1.79) was positively loaded with brood size at hatching (0.90) and fledging (0.88), while PCA2 (0.89) only with clutch size (0.88).
